# Supplementary material
Source: HighWire-hosted journal article supplement (https://erj.ersjournals.com/content/55/4/1901872)
Supplement: inline-supplementary-material-1 [file inline-supplementary-material-1.pdf]

## Supplementary data

**Figure S1.** Proportion of patients on ICS therapy in different SABA overuse groups, according to continuous overuse of SABA during the baseline year (top panel) and after 3 years follow-up (lower panel)

### ICS and SABA use during baseline year

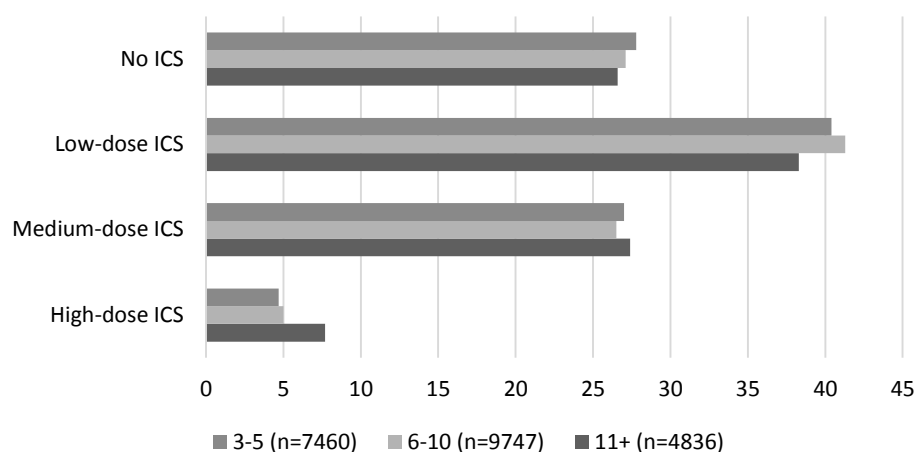

### ICS and SABA use during year 3

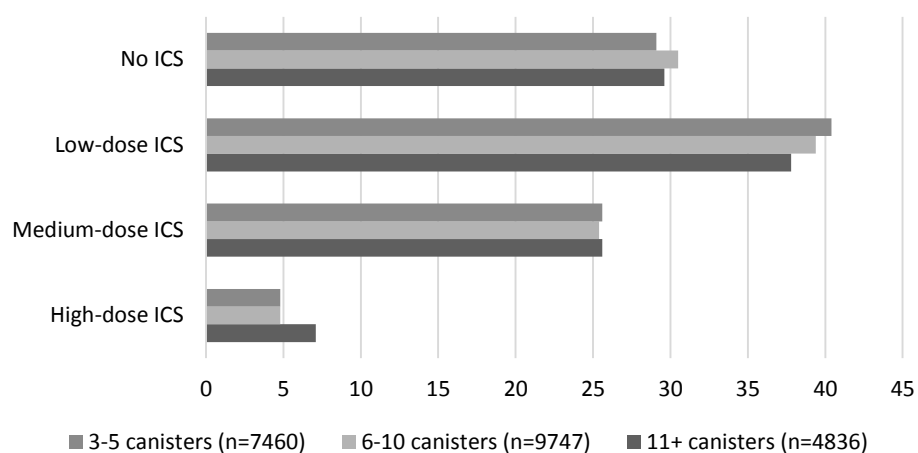

**Table S1.** Definition of treatment steps

| Treatment step | Definition                                                                                                       |
|----------------|------------------------------------------------------------------------------------------------------------------|
| Step 0         | - No dispensing of SABA, LABA, LTRA or ICS                                                                       |
| Step 1         | - SABA monotherapy                                                                                               |
| Step 2         | - Low-dose ICS<br>- LTRA monotherapy                                                                             |
| Step 3         | - Medium-/high-dose ICS<br>- Low-dose ICS + LABA or LTRA                                                         |
| Step 4         | - Medium-/high-dose ICS + LABA<br>- Medium-/high-dose ICS + LABA or tiotropium<br>- Medium-/high-dose ICS + LTRA |
| Step 5         | - Continuous use of oral steroids (OCS)*<br>- Continuous use of anti-IgE or anti-IL5                             |

\*Equivalent to a cumulative dosage of  $\geq 1000$  mg prednisolone per year

**Table S2.** SABA and ICS use during study period

|                                  | <b>Baseline year<br/>(n=365,324)</b> | <b>Follow-up year 1<br/>(n=365,324)</b> | <b>Follow-up year 2<br/>(n=365,073)</b> | <b>Follow-up year 3<br/>(n=334,847)</b> |
|----------------------------------|--------------------------------------|-----------------------------------------|-----------------------------------------|-----------------------------------------|
| <b>SABA canisters,<br/>n (%)</b> |                                      |                                         |                                         |                                         |
| 0-2                              | 254,500 (69.7%)                      | 301,413 (82.5%)                         | 306,849 (84.1%)                         | 283,385 (84.6%)                         |
| 3-5                              | 76,619 (21.0%)                       | 41,846 (11.5%)                          | 37,540 (10.3%)                          | 32,589 (9.7%)                           |
| 6-10                             | 27,065 (7.4%)                        | 16,575 (4.5%)                           | 15,304 (4.2%)                           | 13,861 (4.1%)                           |
| 11+                              | 7,140 (2.0%)                         | 5,490 (1.5%)                            | 5,380 (1.5%)                            | 5,012 (1.5%)                            |
| <b>ICS dose, n (%)</b>           |                                      |                                         |                                         |                                         |
| No ICS                           | 100,587 (27.5%)                      | 203,484 (55.7%)                         | 214,575 (58.8%)                         | 205,755 (61.4%)                         |
| Low dose                         | 149,925 (41.0%)                      | 94,964 (26.0%)                          | 90,310 (24.7%)                          | 79,185 (23.6%)                          |
| Medium dose                      | 98,449 (26.9%)                       | 57,820 (15.8%)                          | 51,987 (14.2%)                          | 43,126 (12.9%)                          |
| High dose                        | 16,363 (4.5%)                        | 9,056 (2.5%)                            | 8,201 (2.2%)                            | 6,781 (2.0%)                            |

**Table S3.** Risk of exacerbation after baseline period stratified by history of exacerbation during baseline period

|                                    | <b>Crude</b>       |                | <b>Adjusted</b>    |                |
|------------------------------------|--------------------|----------------|--------------------|----------------|
|                                    | <b>HR (95% CI)</b> | <b>P value</b> | <b>HR (95% CI)</b> | <b>P value</b> |
| <b>No exacerbation at baseline</b> |                    |                |                    |                |
| <b>Baseline SABA use</b>           |                    |                |                    |                |
| ≤2 canisters                       | 1.00               |                | 1.00               |                |
| 3-5 canisters                      | 1.16 (1.14-1.18)   | <0.001         | 1.20 (1.18-1.22)   | <0.001         |
| 6-10 canisters                     | 1.34 (1.31-1.37)   | <0.001         | 1.33 (1.30-1.36)   | <0.001         |
| 11+ canisters                      | 1.72 (1.65-1.79)   | <0.001         | 1.62 (1.55-1.69)   | <0.001         |
| <b>Exacerbation at baseline</b>    |                    |                |                    |                |
| <b>Baseline SABA use</b>           |                    |                |                    |                |
| ≤2 canisters                       | 1.00               |                | 1.00               |                |
| 3-5 canisters                      | 1.21 (1.18-1.24)   | <0.001         | 1.19 (1.16-1.22)   | <0.001         |
| 6-10 canisters                     | 1.37 (1.32-1.42)   | <0.001         | 1.33 (1.29-1.38)   | <0.001         |
| 11+ canisters                      | 1.60 (1.51-1.69)   | <0.001         | 1.53 (1.45-1.61)   | <0.001         |

Adjusted for treatment step (GINA 2018), gender, age, and Charlson Comorbidity Index.
